# Supplementary material
Source: PubMed Central journal article supplement (PMC2981698)
Supplement: NIHMS225219-supplement-supplement_1.pdf [file NIHMS225219-supplement-supplement_1.pdf]

Supplementary analysis. Prevalence, exploratory factor analysis, and 2-parameter item response theory analysis estimates for 1) existing DSM-IV criteria defined on a lifetime basis and 2) the addition of craving defined on a lifetime basis, among lifetime drinkers in the general population (N=27,616)

|                                   | %          | Model 1: existing DSM-IV criteria (lifetime) |              |              |               |               | Model 2: existing DSM-IV criteria plus <i>Craving</i> (lifetime) |              |              |               |               |
|-----------------------------------|------------|----------------------------------------------|--------------|--------------|---------------|---------------|------------------------------------------------------------------|--------------|--------------|---------------|---------------|
|                                   |            | One factor                                   | Two factors* |              | Discrim. (SE) | Severity (SE) | One factor                                                       | Two factors* |              | Discrim. (SE) | Severity (SE) |
| Neglect roles (A)                 | 14.3 (0.6) | 0.85                                         | <b>0.71</b>  | -0.19        | 0.59 (0.0)    | 2.13 (0.0)    | 0.85                                                             | <b>0.68</b>  | -0.23        | 0.59 (0.0)    | 2.13 (0.0)    |
| Hazardous use (A)                 | 39.0 (1.4) | 0.80                                         | 0.03         | <b>-0.96</b> | 1.33 (0.0)    | 0.36 (0.0)    | 0.80                                                             | 0.04         | <b>-0.95</b> | 1.32 (0.0)    | 0.36 (0.0)    |
| Legal problems (A)                | 9.6 (0.5)  | 0.67                                         | 0.28         | <b>-0.48</b> | 0.95 (0.0)    | 1.97 (0.0)    | 0.67                                                             | 0.28         | <b>-0.48</b> | 0.94 (0.0)    | 1.97 (0.0)    |
| Social/Interpersonal problems (A) | 16.4 (0.6) | 0.87                                         | <b>0.79</b>  | -0.11        | 1.81 (0.0)    | 1.16 (0.0)    | 0.87                                                             | <b>0.76</b>  | -0.15        | 1.81 (0.0)    | 1.16 (0.0)    |
| Tolerance (D)                     | 38.7 (0.8) | 0.76                                         | <b>0.65</b>  | -0.15        | 1.17 (0.0)    | 0.39 (0.0)    | 0.76                                                             | <b>0.62</b>  | -0.18        | 2.07 (0.1)    | 0.39 (0.0)    |
| Withdrawal (D)                    | 27.5 (0.6) | 0.81                                         | <b>0.70</b>  | -0.15        | 1.39 (0.0)    | 0.76 (0.0)    | 0.81                                                             | <b>0.68</b>  | -0.18        | 1.18 (0.0)    | 0.76 (0.0)    |
| Larger/Longer (D)                 | 45.6 (1.1) | 0.79                                         | <b>0.54</b>  | -0.30        | 1.30 (0.0)    | 0.14 (0.0)    | 0.78                                                             | <b>0.51</b>  | -0.33        | 1.40 (0.0)    | 0.14 (0.0)    |
| Quit/Control (D)                  | 35.4 (0.8) | 0.70                                         | <b>0.70</b>  | -0.01        | 0.95 (0.0)    | 0.55 (0.0)    | 0.70                                                             | <b>0.66</b>  | -0.06        | 1.30 (0.0)    | 0.55 (0.0)    |
| Time Spent (D)                    | 8.4 (0.3)  | 0.90                                         | <b>0.94</b>  | 0.04         | 2.06 (0.1)    | 1.59 (0.0)    | 0.90                                                             | <b>0.92</b>  | 0.02         | 0.95 (0.0)    | 1.58 (0.0)    |
| Activities Given Up (D)           | 4.9 (0.2)  | 0.93                                         | <b>1.01</b>  | 0.09         | 2.38 (0.1)    | 1.88 (0.0)    | 0.93                                                             | <b>0.95</b>  | 0.02         | 2.10 (0.1)    | 1.88 (0.0)    |
| Phys/Psych Problems (D)           | 10.9 (0.4) | 0.87                                         | <b>0.94</b>  | 0.08         | 1.83 (0.1)    | 1.45 (0.0)    | 0.88                                                             | <b>0.93</b>  | 0.05         | 2.36 (0.1)    | 1.45 (0.0)    |
| Craving                           | 3.5 (0.1)  |                                              |              |              |               |               | 0.89                                                             | <b>1.01</b>  | 0.14         | 1.86 (0.1)    | 2.10 (0.0)    |
| Eigenvalue                        |            | 7.564                                        | 0.679        |              |               |               | 8.327                                                            | 0.716        |              |               |               |
| CFL                               |            | 0.995                                        | 0.998        |              |               |               | 0.995                                                            | 0.998        |              |               |               |
| TLI                               |            | 0.994                                        | 0.996        |              |               |               | 0.994                                                            | 0.997        |              |               |               |
| RMSEA                             |            | 0.032                                        | 0.026        |              |               |               | 0.031                                                            | 0.023        |              |               |               |
| SRMR                              |            | 0.039                                        | 0.025        |              |               |               | 0.041                                                            | 0.024        |              |               |               |
| Akaike (AIC)                      |            |                                              |              |              | 231935.035    |               |                                                                  |              |              | 227671.590    |               |
| Bayesian (BIC)                    |            |                                              |              |              | 232116.011    |               |                                                                  |              |              | 227860.791    |               |
| Sample-Size Adjusted              |            |                                              |              |              | 232046.095    |               |                                                                  |              |              | 227787.698    |               |

\* Bolded text indicates factor loadings greater than an absolute value for 0.4
